# Supplementary material for: Subjective Overload and Psychological Distress among Dentists during COVID-19
Source: PubMed Central journal article supplement (PMC7399825; doi:10.3390/ijerph17145074), 2020-07-14
Supplement: ijerph-17-05074-s001.pdf [file ijerph-17-05074-s001.pdf]

## Online Supporting Material

**Table S1.** MANCOVA results including effect size for subjective overload X psychological distress (n= 1302)

| Source                                         | DV | Type III<br>Sum of<br>Squares | Mean<br>Square | F      | Sig. | Partial<br>Eta<br>Squared |
|------------------------------------------------|----|-------------------------------|----------------|--------|------|---------------------------|
| Age                                            | SO | 53.019                        | 53.019         | 2.337  | .127 | .002                      |
|                                                | K6 | 37.253                        | 37.253         | 2.101  | .147 | .002                      |
| Sex                                            | SO | 121.647                       | 121.647        | 5.362  | .021 | .004                      |
|                                                | K6 | 1.456                         | 1.456          | .082   | .775 | .000                      |
| Marital Status                                 | SO | .405                          | .405           | .018   | .894 | .000                      |
|                                                | K6 | 23.543                        | 23.543         | 1.328  | .249 | .001                      |
| High Risk for COVID-19                         | SO | 5.064                         | 5.064          | .223   | .637 | .000                      |
|                                                | K6 | 6.451                         | 6.451          | .364   | .547 | .000                      |
| Fear of Contracting COVID-19 from<br>Patient   | SO | 692.031                       | 692.031        | 30.506 | .000 | .023                      |
|                                                | K6 | 1184.940                      | 1184.940       | 66.828 | .000 | .049                      |
| Fear of Infecting the Family with COVID-<br>19 | SO | 358.131                       | 358.131        | 15.787 | .000 | .012                      |
|                                                | K6 | 365.772                       | 365.772        | 20.629 | .000 | .016                      |
| Information how to Protect Against<br>COVID-19 | SO | 104.279                       | 104.279        | 4.597  | .032 | .004                      |
|                                                | K6 | 267.234                       | 267.234        | 15.071 | .000 | .012                      |
| Country                                        | SO | 745.943                       | 186.486        | 8.221  | .000 | .025                      |
|                                                | K6 | 285.305                       | 71.326         | 4.023  | .003 | .012                      |

DV = Dependent Variable; So = Subjective Overload; K6 = Psychological Distress
